# Supplementary material
Source: PubMed Central journal article supplement (PMC6536376)

**SUPPLEMENTAL FIGURE 1.** NSD2, MOF, and KDM5B expression in less aggressive (A, C, E) and aggressive (B, D, F) types of basal cell carcinoma. No significant difference is observed in NSD2 (A, B), MOF (C, D), and KDM5B (E, F) expression between a representative less aggressive tumor and a representative aggressive tumor. (A and B, NSD2 IHC stain; C and D, MOF IHC stain; E and F, KDM5B IHC stain; original magnification, 40x).

**SUPPLEMENTAL FIGURE 2.** Correlation plots for all the pairwise correlations examined in the report. Lowess curves are overlaid to show trends, and points are jittered to avoid overlap.

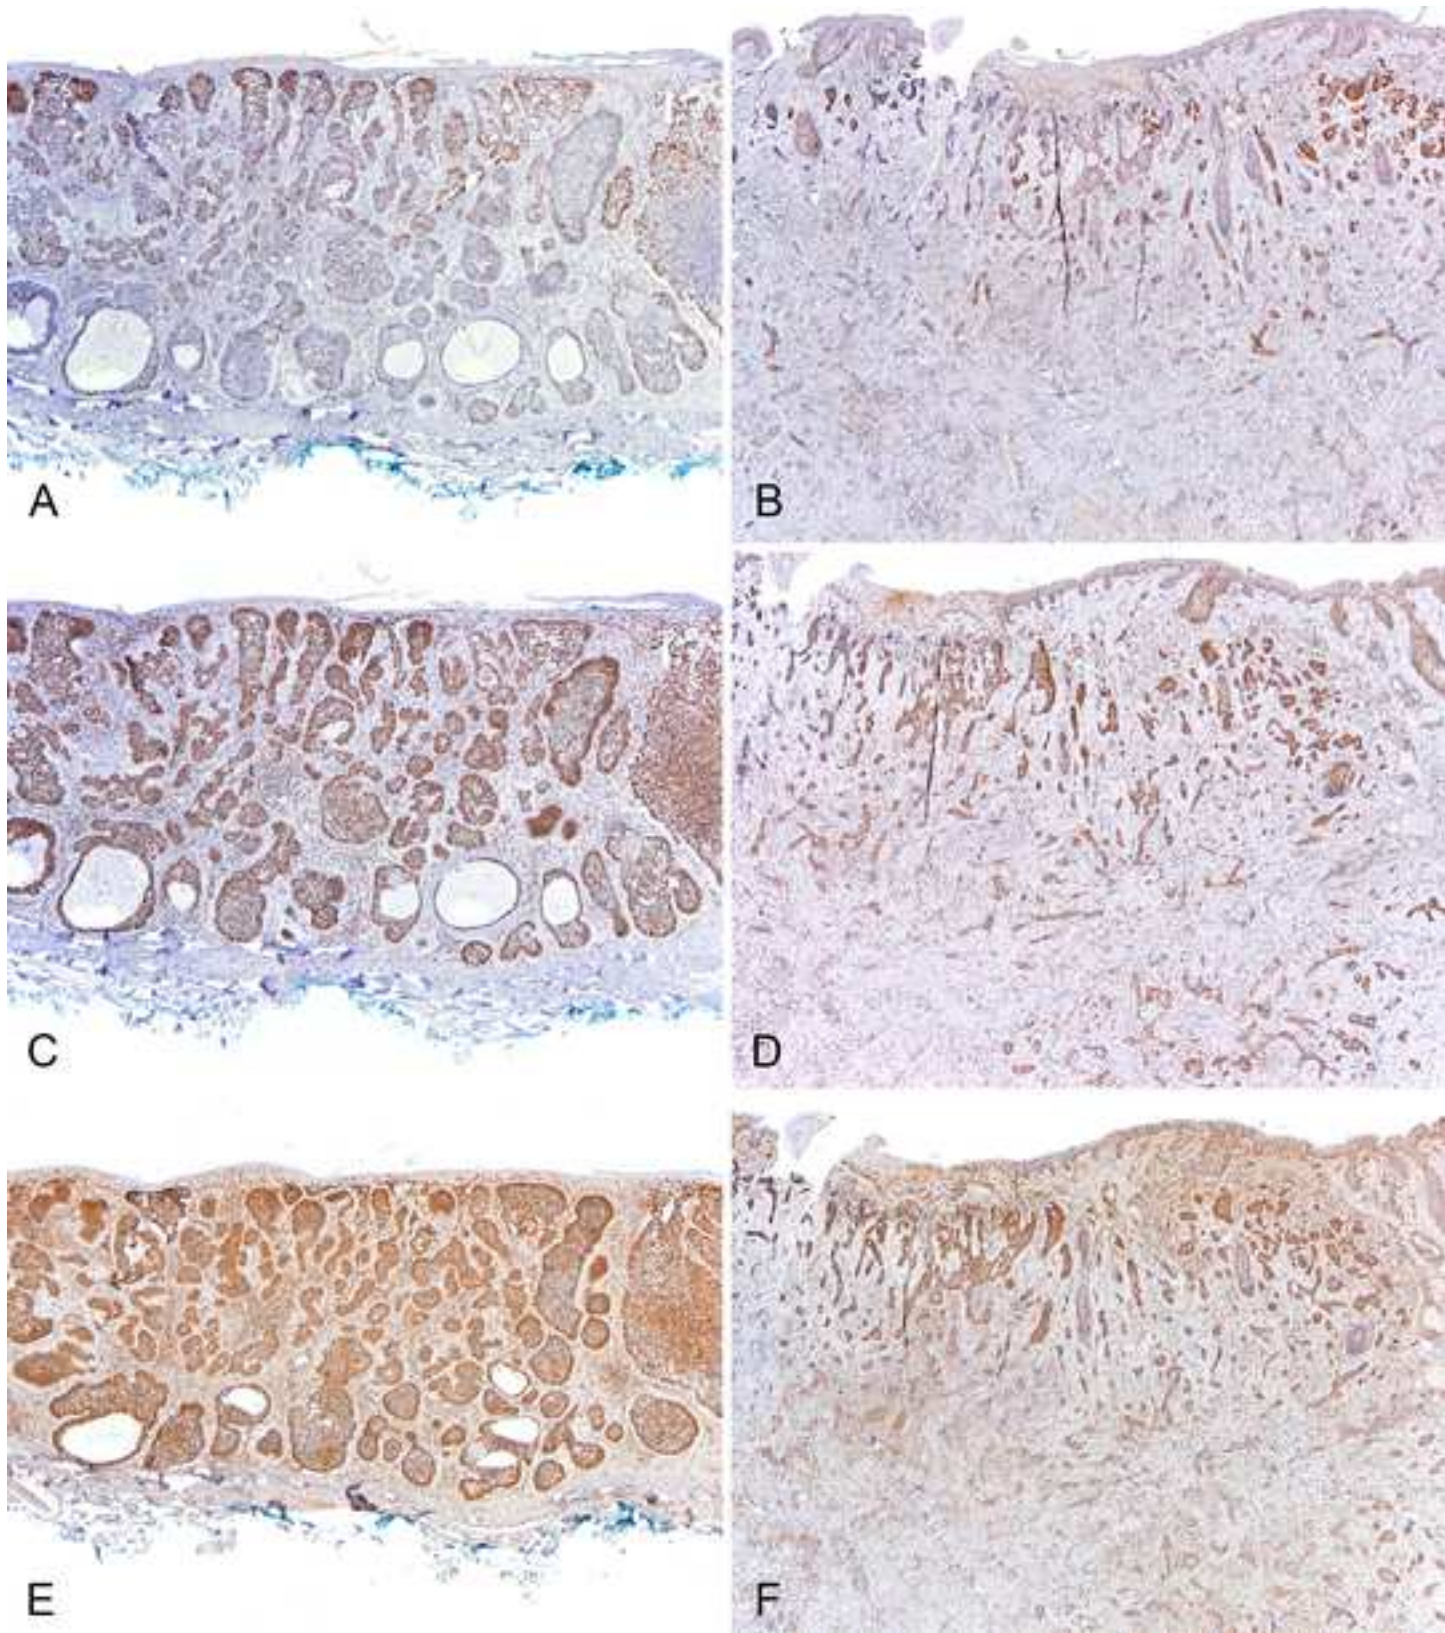

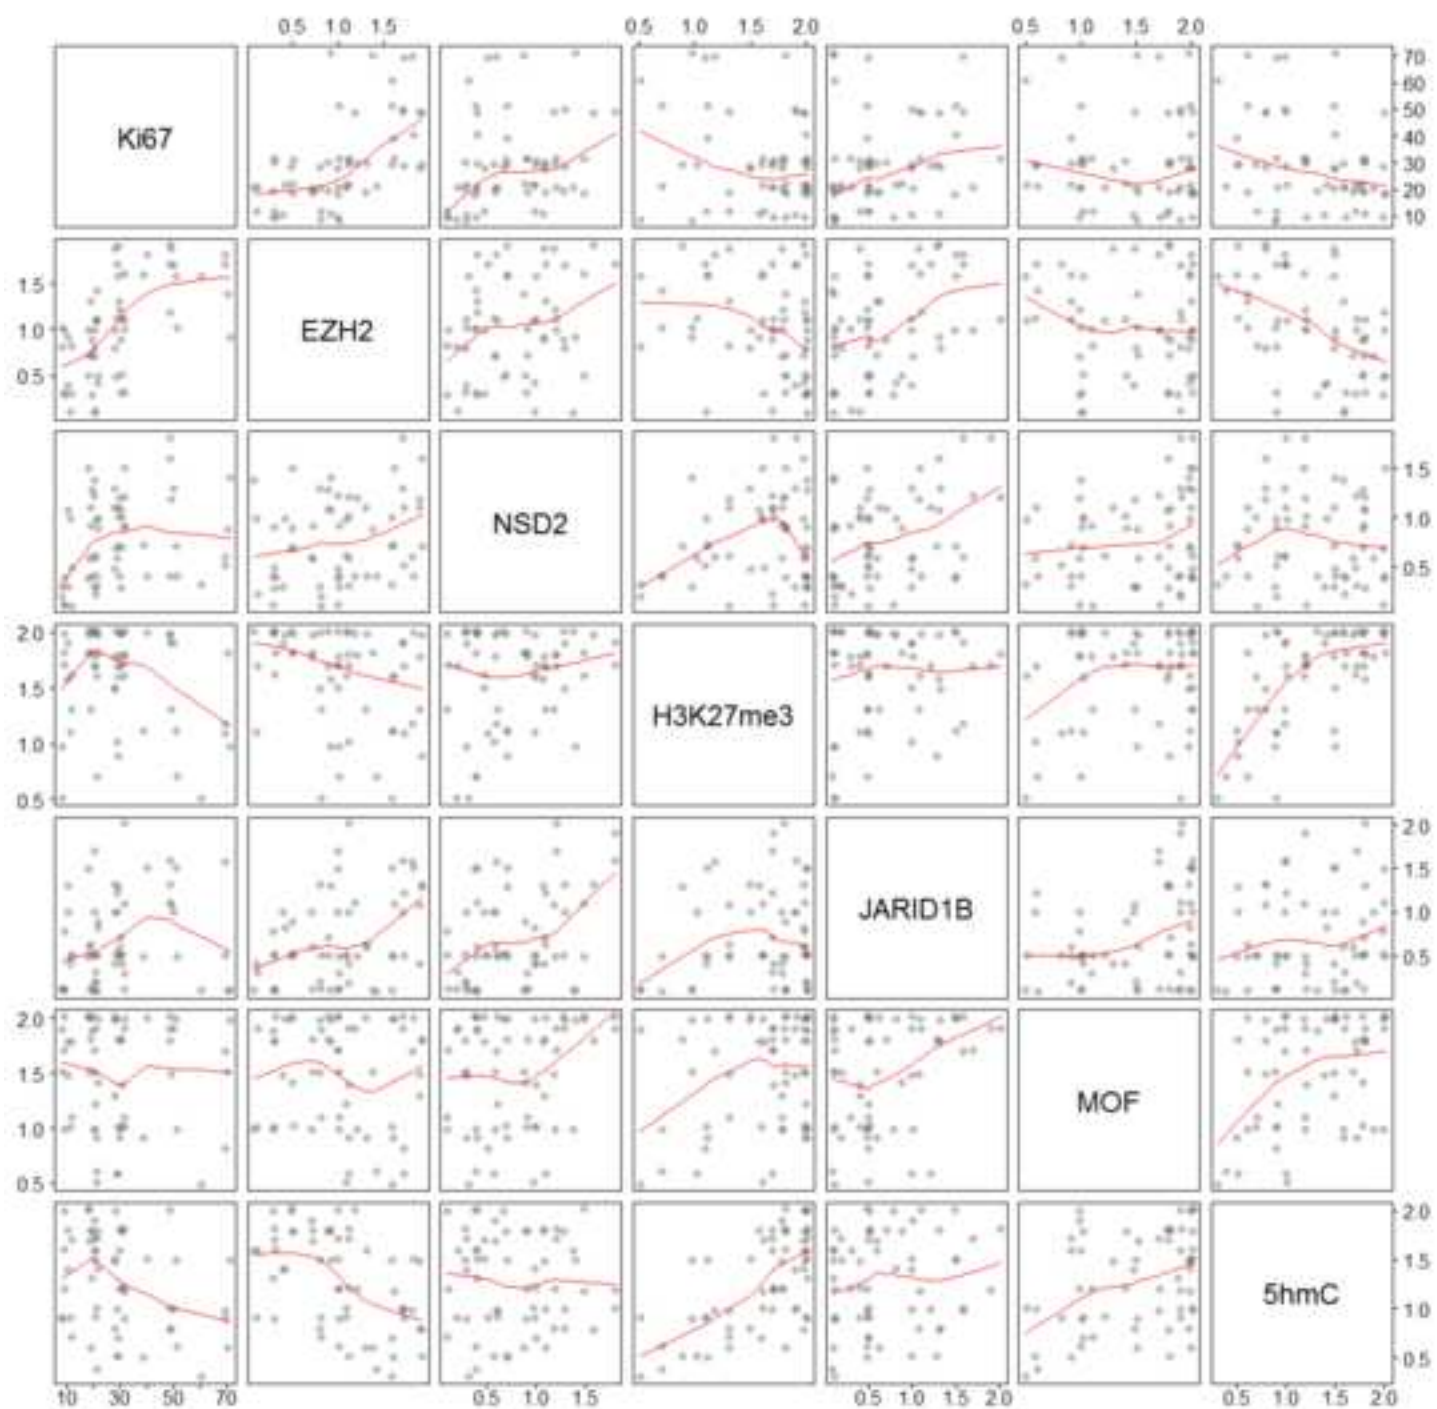

Supplement: NIHMS1015191-supplement-1.pdf [file NIHMS1015191-supplement-1.pdf]
